# Supplementary material for: N-cadherin promotes thyroid tumorigenesis through modulating major signaling pathways
Source: PubMed Central journal article supplement (PMC5352388; doi:10.18632/oncotarget.14101), 2016-12-22
Supplement: oncotarget-08-8131-s001.pdf [file oncotarget-08-8131-s001.pdf]

## N-cadherin promotes thyroid tumorigenesis through modulating major signaling pathways

### SUPPLEMENTARY FIGURES AND TABLES

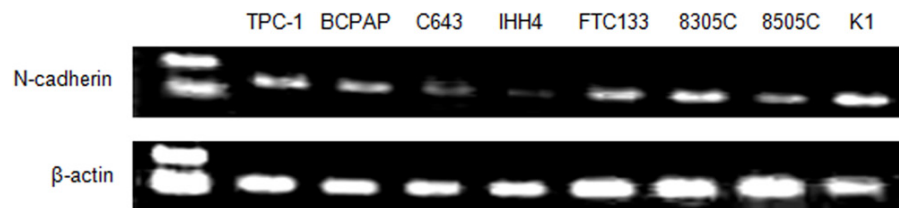

**Supplementary Figure 1: N-cadherin mRNA expression in eight thyroid cancer cell lines.** N-cadherin mRNA expression in thyroid cancer cell lines was determined by conventional RT-PCR assay.  $\beta$ -actin was used as a load control.

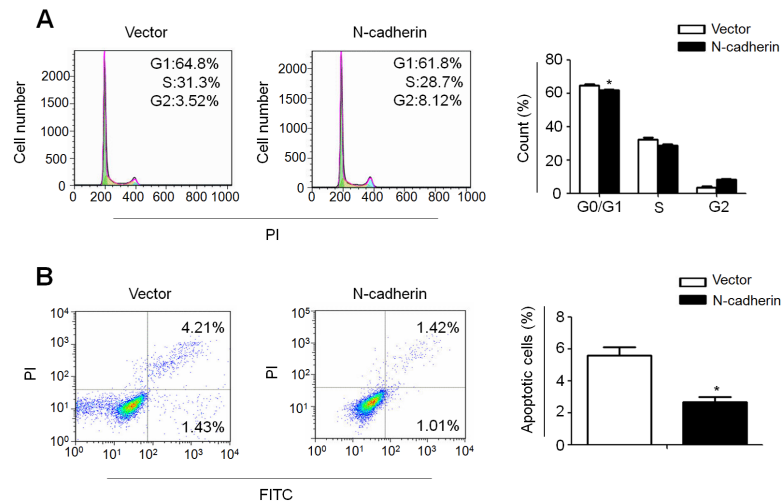

**Supplementary Figure 2: N-cadherin promotes cell cycle progression and inhibits cell apoptosis in IHH4 cells. A.** IHH4 cells were transiently transfected with the indicated constructs. DNA content was measured by flow cytometry to determine cell cycle fractions. The fraction of cells in each cell cycle phase was indicated in the figures. **B.** Early and late apoptotic cells were measured by cytometry analysis using Annexin V-FITC Detection Kit. The data were presented as mean  $\pm$  SD of values from three independent experiments. Statistically significant differences were indicated: \*,  $P < 0.05$ .

Supplementary Table 1: qRT-PCR primers used in this study

| Genebank (ID) | Genes             | Forward primer (5'-3') | Reverse primer (5'-3') | Product length (bp) |
|---------------|-------------------|------------------------|------------------------|---------------------|
| NM_001792.4   | <i>N-cadherin</i> | GTGCATGAAGGACAGCCTCT   | CCACCTTAAAATCTGCAGGC   | 100                 |
| NM_000474.3   | <i>Twist</i>      | TCCATTTTCTCCTTCTCTGGAA | CCTTCTCGGTCTGGAGGAT    | 127                 |
| NM_005985.3   | <i>Snail</i>      | CCTTCTCTAGGCCCTGGCT    | AGGTTGGAGCGGTCAGC      | 106                 |
| NM_003068.4   | <i>Slug</i>       | TCGGACCCACACATTACCTT   | GCAGTGAGGGCAAGAAAAAG   | 121                 |
| NM_004530.5   | <i>MMP-2</i>      | GGAAAGCCAGGATCCATTTT   | ATGCCGCCTTTAACTGGAG    | 103                 |
| NM_004994.2   | <i>MMP-9</i>      | ACGACGTCTTCCAGTACCGA   | GCACTGCAGGATGTCATAGG   | 128                 |
| NM_004995.3   | <i>MMP-14</i>     | GTGGTCTCGGACCATGTCTC   | GGTAGCCATATTGCTGTAGCC  | 146                 |
| R_003286.2    | <i>18S</i>        | CGCCGCTAGAGGTGAAATTC   | CTTTCGCTCTGGTCCGTCTT   | 52                  |

**Supplementary Table 2: The sequences of siRNAs used in this study**

| <b>si-RNAs</b>            | <b>Sequences (5'-3')</b> |
|---------------------------|--------------------------|
| si-N-cadherin (sense)     | GACCAUCACUCGGCUUAAUTT    |
| si-N-cadherin (antisense) | AUUAAGCCGAGUGAUGGUCTT    |
| si-NC (sense)             | UUCUCCGAACGUGUCACGUTT    |
| si-NC (antisense)         | ACGUGACACGUUCGGAGAATT    |
